# Supplementary material for: A novel sandwich-type polyoxometalate compound with visible-light photocatalytic H2 evolution activity
Source: Royal Society of Chemistry journal article supplement (doi:10.1039/c0cc04697c), 2011-01-01
Supplement: c0cc04697c.pdf [file c0cc04697c.pdf]

## Supporting Information

### **A Novel Sandwich-Type Polyoxometalate Compound with Visible Light Photocatalytic H<sub>2</sub> Evolution Activity**

Zhenyu Zhang<sup>a</sup>, Qipu Lin<sup>a</sup>, Shoutian Zheng,<sup>b</sup>

Xianhui Bu<sup>b</sup>, Pingyun Feng<sup>a\*</sup>

<sup>a</sup>Department of Chemistry  
University of California,  
Riverside, CA 92521, U. S. A  
Fax:(+1)951-8274713; Tel:(+1)951-8272042

<sup>b</sup>Department of Chemistry and Biochemistry  
California State University, Long Beach  
1250 Bellflower Boulevard  
Long Beach, CA 90840, USA

\*To whom correspondence should be addressed. E-mail: [pingyun.feng@ucr.edu](mailto:pingyun.feng@ucr.edu)

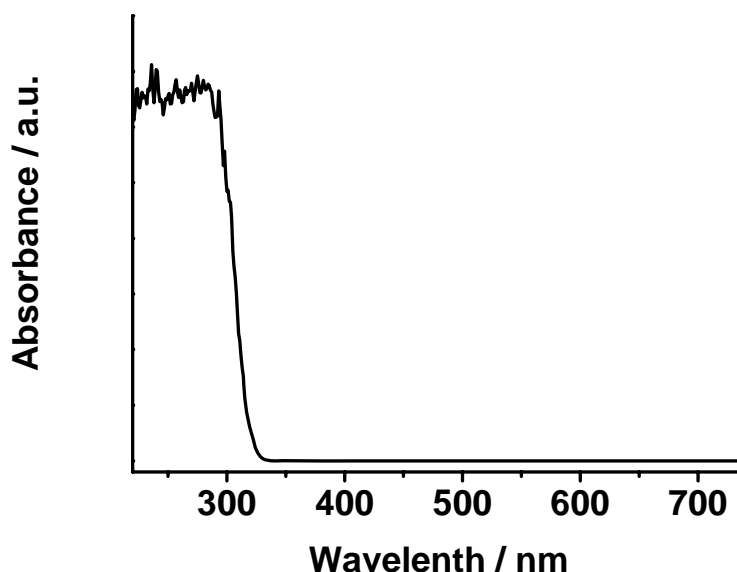

Figure S1. UV-Vis spectrum of  $\text{Na}_{10}[\alpha\text{-SiW}_9\text{O}_{34}] \cdot x\text{H}_2\text{O}$

### Single crystal analysis of 1

The data were collected on Bruker APEX II diffractometer equipped with a fine focus, 2.0 kW sealed tube X-ray source (MoK $\alpha$  radiation,  $\lambda = 0.71073 \text{ \AA}$ ) operating at 50 kV and 30 mA. The crystal data: Triclinic, P-1,  $a = 13.6358(16) \text{ \AA}$ ,  $b = 20.7414(18) \text{ \AA}$ ,  $c = 16.0530(24) \text{ \AA}$ ,  $\alpha = 100.093(2)^\circ$ ,  $\beta = 90.703(2)^\circ$ ,  $\gamma = 101.961(2)^\circ$ ,  $V = 4367.2(8) \text{ \AA}^3$ ,  $Z = 1$ ,  $D_c = 4.391 \text{ g cm}^{-3}$ , 21615 measured reflections,  $R_1 = 0.0584$  for 16067 reflections ( $I > 2 \sigma(I)$ ),  $\text{GOF} = 0.997$ . The structure was solved by direct methods and refined by full-matrix least-squares method based on  $|F^2|$  using the *SHELXTL 5.1* programs suite. All non-hydrogen atoms were refined with anisotropic displacement parameters.

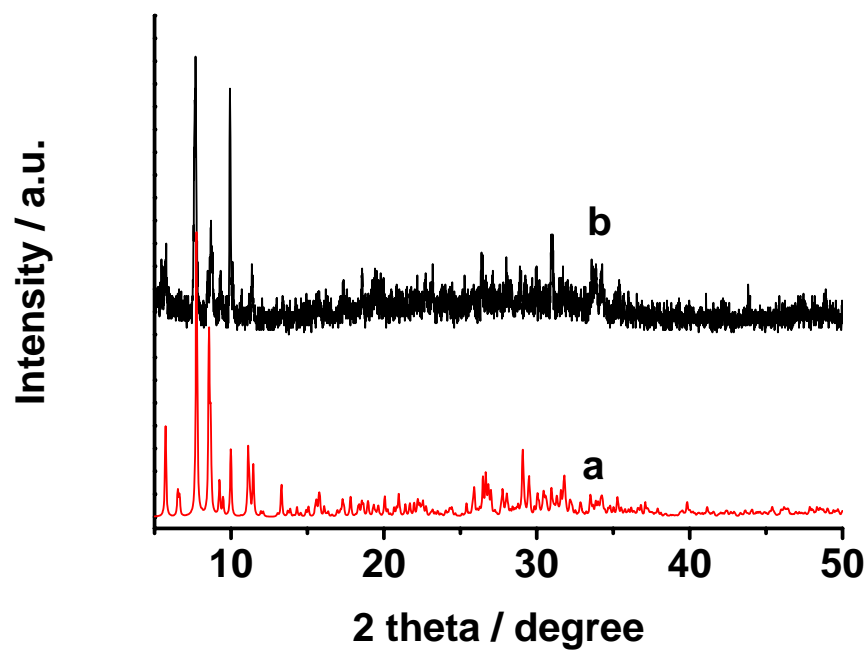

*Figure S2.* Simulated XRD pattern(a) and measured XRD pattern of **1**. ICP elemental analysis(The PerkinElmer OPTIMA 2000 ICP optical emission spectrometer) indicated the ratio of K: Sn: Si: W in compound **1** is 10.38:3.88:2.00:17.37 which support the purity and the composition of the compound **1**.

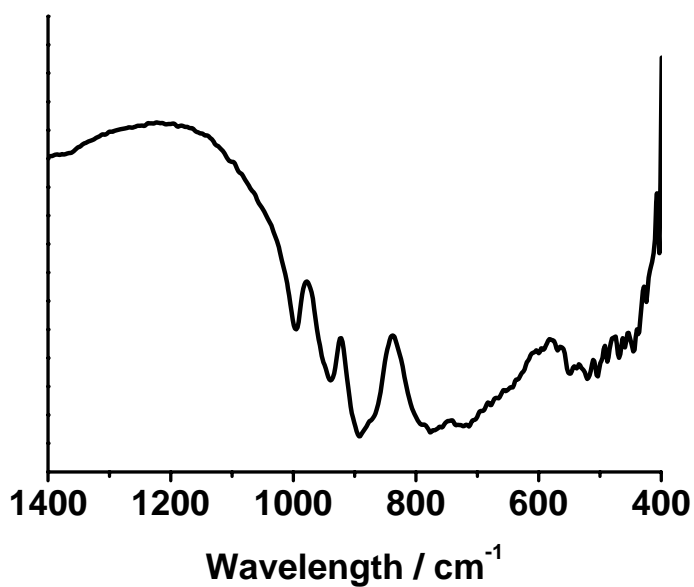

*Figure S3.* FT-IR spectrum of compound **1**. The peaks at 993, 937, 890 and 789  $\text{cm}^{-1}$  can be attributed to  $\nu(\text{Si-O})$  and  $\nu(\text{W-O})$ .

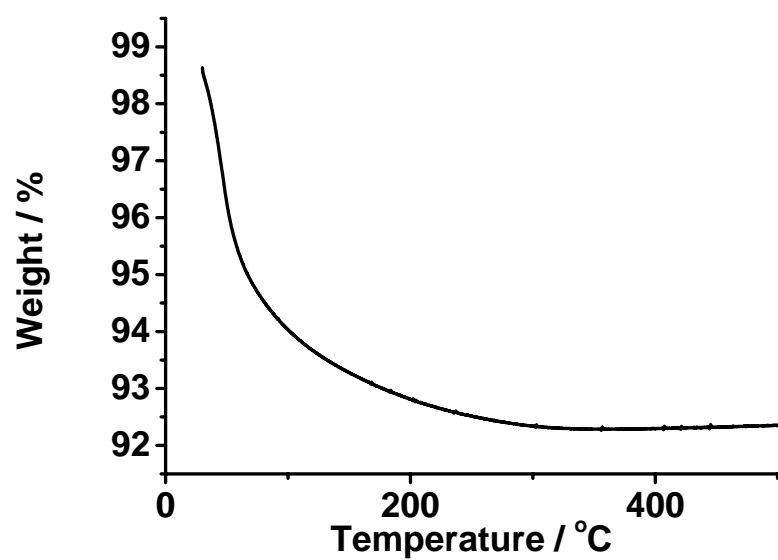

Figure S4. TGA curve of compound 1.

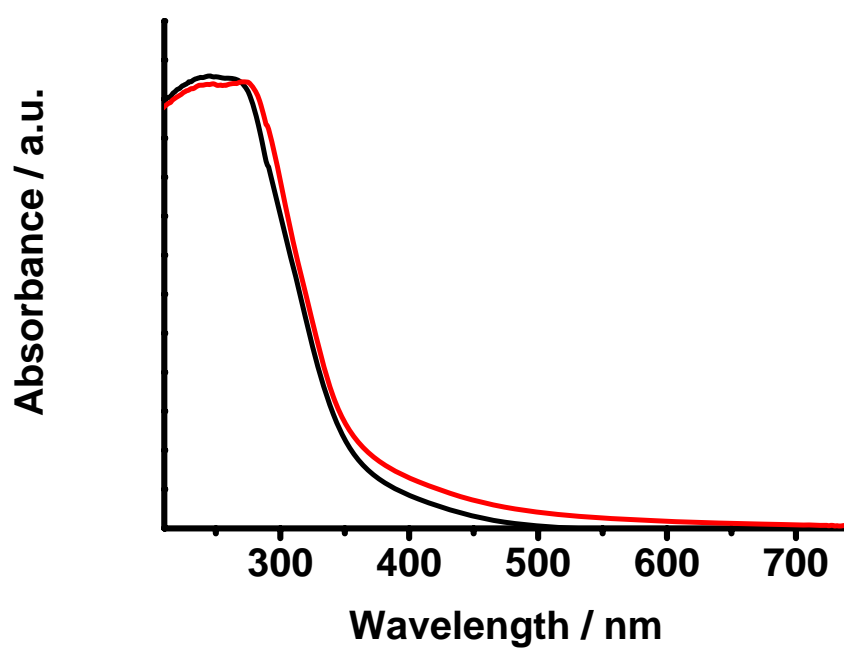

Figure S5. UV-Vis spectra of 1 before(black) and after(red) 5 runs of the photocatalytic reactions with 0.5% Pt nanoparticles as co-catalyst in 20% methanol solution.

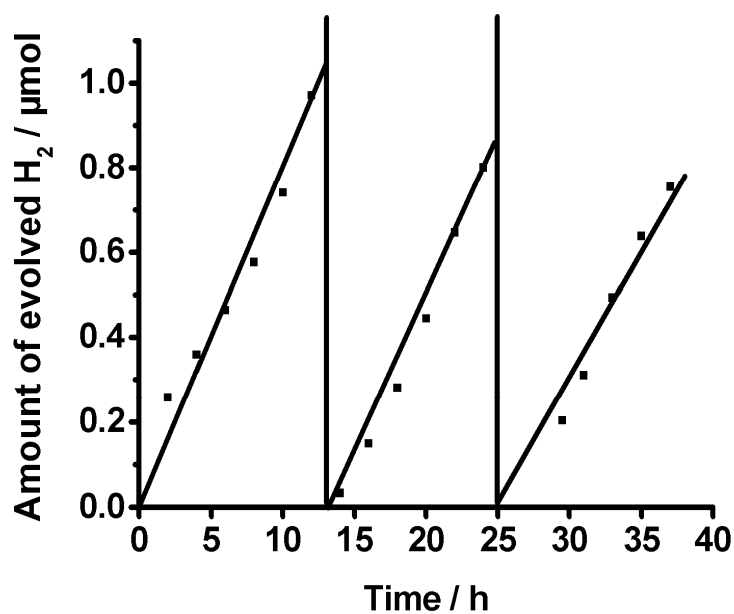

Figure S6. Time course of H<sub>2</sub> evolution from photocatalytic reaction (>400nm) on compound 2.

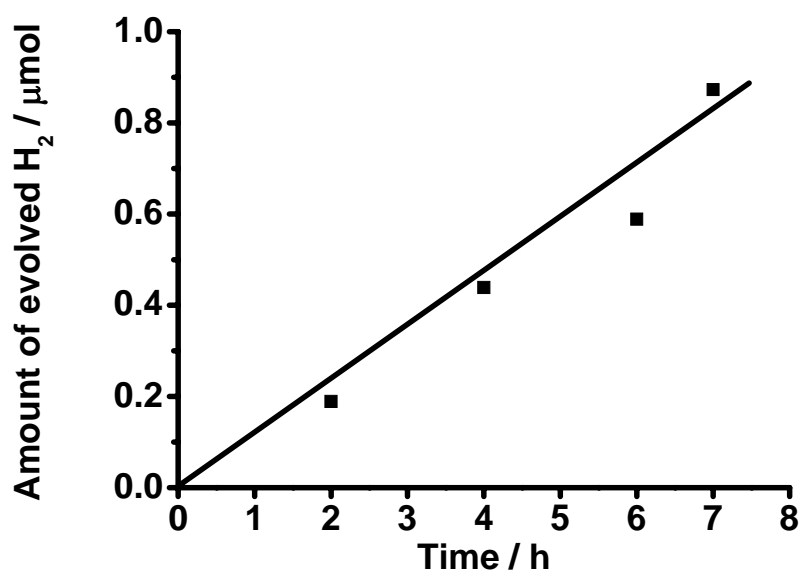

Figure S7. Time course of H<sub>2</sub> evolution from photocatalytic reaction (>400nm) on 3% Pt loaded Ta<sub>3</sub>N<sub>5</sub> in 20% methanol solution. Ta<sub>3</sub>N<sub>5</sub> was prepared according to literature (G. Hitoki, A. Ishikawa, T. Takata, J.N. Kondo, M. Hara and K. Domen, *Chem. Lett.* **2002**, 7, 736)
